# Supplementary material for: Review on mechanisms of hypoglycemic effects of compounds from highland barley and potential applications
Source: Royal Society of Chemistry journal article supplement (doi:10.1039/d4fo00940a), 2024-01-01
Supplement: d4fo00940a1.pdf [file d4fo00940a1.pdf]

1

## Supplementary material

2 **Table S1** The content and kinds of amino acids in highland barley (g/100g) (AL-Ansi  
3 et al., 2020).

| Amino acids | Content      |
|-------------|--------------|
| Asp         | 0.786 ± 0.04 |
| Glu         | 3.129 ± 0.15 |
| Ser         | 0.401 ± 0.02 |
| His         | 0.326 ± 0.02 |
| Gly         | 0.509 ± 0.03 |
| Thr         | 0.438 ± 0.02 |
| Arg         | 0.521 ± 0.03 |
| Ala         | 0.465 ± 0.02 |
| Tyr         | 0.273 ± 0.01 |
| Cys-s       | 0.002 ± 0.00 |
| Val         | 0.651 ± 0.03 |
| Met         | 0.127 ± 0.01 |
| Phe         | 0.666 ± 0.03 |
| Ile         | 0.451 ± 0.02 |
| Leu         | 0.782 ± 0.04 |
| Lys         | 0.386 ± 0.02 |
| Pro         | 1.001 ± 0.05 |
| TAA         | 10.91 ± 0.57 |

4 Note: Results are the mean of three samples ± standard deviation. Total amino acids

5 (TAA).

6 **Table S2** Fatty acids composition of highland barley (%) (AL-Ansi et al., 2020).

| Fatty acids | Content      |
|-------------|--------------|
| C15:1       | 1.06 ± 0.05  |
| C16         | 19.11 ± 0.96 |
| C18         | 2.00 ± 0.10  |
| C18:1C      | 18.82 ± 0.94 |
| C18:2C      | 51.54 ± 2.58 |
| C18:3n6     | 4.41 ± 0.22  |
| C18:3n3     | 0.95 ± 0.05  |
| C22:1       | 1.51 ± 0.05  |
| C24:0       | 0.35 ± 0.02  |
| C22:5n6     | 0.25 ± 0.01  |

7 Note: Results are the mean of three samples ± standard deviation.

8 **Table S3** Profile of phenolic acids and flavonoids in colored highland barley grains ( $\mu\text{g/g}$ ) (Mean  $\pm$  SD) (Dang et al., 2022).

| Compounds      |                           | Purple             | Blue               | Black              | Yellow             |
|----------------|---------------------------|--------------------|--------------------|--------------------|--------------------|
|                | Phloxol                   | 2.88 $\pm$ 0.32 c  | 3.71 $\pm$ 1.71 b  | 82.05 $\pm$ 0.70 a | 1.50 $\pm$ 0.17 d  |
|                | Gallic acid               | 10.26 $\pm$ 0.12 b | 9.11 $\pm$ 0.29 c  | 20.47 $\pm$ 0.92 a | 10.10 $\pm$ 0.26 b |
|                | Protocatechuic acid       | 36.63 $\pm$ 3.64 b | 24.98 $\pm$ 5.52 c | 22.93 $\pm$ 3.51 d | 40.88 $\pm$ 5.44 a |
|                | Chlorogenic acid          | 32.72 $\pm$ 0.98 c | 28.32 $\pm$ 1.08 d | 35.94 $\pm$ 1.43 b | 50.56 $\pm$ 0.84 a |
|                | 2,4-Dihydroxybenzoic acid | 2.52 $\pm$ 1.31 c  | 6.53 $\pm$ 1.23 a  | 0.68 $\pm$ 0.27 d  | 4.86 $\pm$ 0.92 b  |
| Phenolic acids | Vanillic acid             | 10.78 $\pm$ 4.35 b | 5.10 $\pm$ 0.84 c  | 12.20 $\pm$ 0.90 a | 5.75 $\pm$ 1.71 c  |
|                | Syringic acid             | 5.07 $\pm$ 0.24 a  | 3.44 $\pm$ 0.25 b  | 3.29 $\pm$ 0.34 ab | 4.56 $\pm$ 0.35 a  |
|                | p-coumaric acid           | 6.98 $\pm$ 0.37 c  | 9.25 $\pm$ 1.26 b  | 11.76 $\pm$ 2.46 a | 4.31 $\pm$ 0.75 d  |
|                | Ferulic acid              | 4.15 $\pm$ 0.16 b  | 2.52 $\pm$ 0.17 c  | 4.24 $\pm$ 0.18 b  | 7.22 $\pm$ 1.18 a  |
|                | Salicylic acid            | 8.04 $\pm$ 0.19 ab | 8.34 $\pm$ 0.44 a  | 7.65 $\pm$ 0.16 b  | 7.68 $\pm$ 0.33 b  |
|                | benzoic acid              | 42.73 $\pm$ 4.28 a | 2.78 $\pm$ 0.46 a  | 15.56 $\pm$ 1.43 b | 3.16 $\pm$ 1.46 b  |

|            |                 |                |                 |                  |                 |
|------------|-----------------|----------------|-----------------|------------------|-----------------|
|            | O-coumaric acid | 9.49 ± 3.2 a   | 2.36 ± 2.03 c   | 6.95 ± 0.42 b    | 9.29 ± 0.44 a   |
|            | Veratric acid   | 16.30 ± 0.28 b | 9.00 ± 0.78 c   | 20.36 ± 2.15 a   | 5.11 ± 1.36 d   |
|            | TPAH            | 188.55 ± 8.1 b | 115.44 ± 5.58 d | 244.08 ± 17.15 a | 154.97 ± 7.64 c |
|            | Catechin        | 33.65 ± 4.36 b | 33.09 ± 1.71 c  | 41.44 ± 2.71 b   | 46.94 ± 2.72 a  |
|            | Naringin        | 6.63 ± 0.43 a  | 2.37 ± 0.16 d   | 4.06 ± 0.44 b    | 3.05 ± 0.76 c   |
|            | Hesperidin      | 3.47 ± 1.12 a  | 2.01 ± 0.92 b   | 3.59 ± 1.22 a    | nd              |
|            | Myricetin       | 0.47 ± 0.18 b  | nd              | 0.57 ± 0.26 b    | 2.68 ± 1.45 a   |
| Flavonoids | Quercetin       | 7.69 ± 4.22 b  | nd              | 5.53 ± 0.93 c    | 12.21 ± 0.24 a  |
|            | Naringenin      | 9.08 ± 0.36 a  | 8.25 ± 3.70 b   | 7.46 ± 0.22 c    | 5.32 ± 0.10 d   |
|            | Kaempferol      | 13.36 ± 0.19 a | 8.60 ± 7.66 c   | 14.05 ± 0.35 a   | 9.58 ± 0.46 b   |
|            | Rutin           | 8.46 ± 0.82 c  | 11.01 ± 5.55 b  | 9.15 ± 0.45 bc   | 10.32 ± 1.12 a  |
|            | TFH             | 82.81 ± 4.13 b | 65.33 ± 0.12 c  | 85.85 ± 2.11 b   | 90.10 ± 2.38 a  |

---

|     |                  |                  |                   |                   |
|-----|------------------|------------------|-------------------|-------------------|
| TPH | 271.36 ± 69.11 b | 180.77 ± 57.92 d | 329.93 ± 177.02 a | 245.07 ± 105.55 c |
|-----|------------------|------------------|-------------------|-------------------|

---

9 Note: Different letters after data within the same line indicate significant differences ( $p < 0.05$ ). nd: not detected; TPAH, TFH, and TPH: total  
10 phenolic acid content, total flavonoid content, and total phenol content detected by HPLC, respectively.
